# Supplementary material for: Interleukin 28B Polymorphism as a Predictor of Sustained Virological Response to Sofosbuvir-Based Therapy for Hepatitis C Virus Patients
Source: MDPI journal article supplement (doi:10.3390/tropicalmed7090230), 2022-09-05
Supplement: s1 [file s1]

Table S1. Correlation between PCR level of HCV RNA before treatment and demographic, laboratory, ultrasound of the liver and IL28b genotypes in non-responder group.

| PCR of HCV RNA<br>before treatment<br>in non responder<br>group<br>variables | Test of significance    | <i>p</i>      |
|------------------------------------------------------------------------------|-------------------------|---------------|
| Age (years)                                                                  | 0.194 <sup>a</sup>      | 0.160         |
| Gender                                                                       | 0.225 <sup>b</sup>      | 0.102         |
| BMI (kg/m <sup>2</sup> )                                                     | - 0.172 <sup>a</sup>    | 0.213         |
| WBCs(10 <sup>3</sup> /cmm)                                                   | 0.214 <sup>a</sup>      | 0.119         |
| Haemoglobin(g/dl)                                                            | 0.057 <sup>a</sup>      | 0.681         |
| PLT(10 <sup>3</sup> /cmm)                                                    | -0.193 <sup>a</sup>     | 0.162         |
| INR                                                                          | 0.010 <sup>a</sup>      | 0.945         |
| Total bilirubin (mg/dL)                                                      | 0.281 <sup>a</sup>      | <b>0.039*</b> |
| ALT(IU/L)                                                                    | -0.231 <sup>a</sup>     | 0.092         |
| AST(IU/L)                                                                    | 0.067 <sup>a</sup>      | 0.629         |
| Albumin (g/dL)                                                               | 0.080 <sup>a</sup>      | 0.566         |
| Creatinine (mg/dL)                                                           | -0.197 <sup>a</sup>     | 0.153         |
| AFP                                                                          | 0.200 <sup>a</sup>      | 0.147         |
| FIB-4                                                                        | 0.242 <sup>a</sup>      | 0.078         |
| Ultrasound finding<br>Of the liver                                           |                         |               |
| Normal                                                                       |                         |               |
| Parenchymatous liver disease                                                 | P1=9.756 <sup>d</sup>   | 0.008*        |
| cirrhotic                                                                    | P2=-.830 <sup>c</sup>   | 0.407         |
|                                                                              | P3=-2.886 <sup>c</sup>  | <b>0.004*</b> |
| IL28B genotype                                                               |                         |               |
|                                                                              | P4= 3.992 <sup>d</sup>  | 0.136         |
|                                                                              | P5= -1.864 <sup>c</sup> | 0.062         |
|                                                                              | P6= -0.865 <sup>c</sup> | 0.387         |
|                                                                              | P7= -1.098 <sup>c</sup> | 0.272         |

(a) Pearson correlation, (b) Spearman correlation (c) Mann-Whitney, (d) Kruskal-Wallis, (P1) in between groups, (P2) between normal and both parenchymatous and cirrhotic groups, P3: between parenchymatous and cirrhotic groups. P4: in between all genotypes, P5 between TT and CT, P6 between CT and CC, P7 between TT and CC genotypes. \* $p < 0.05$ : statistically significant.

This study revealed statistically significance correlation between PCR level of HCV RNA before treatment and total bilirubin ( $p=0.039$ ) and ultrasound finding of the liver ( $p=0.008$ ) and no statistically significance correlation between it and age, gender, BMI, WBCs, haemoglobin, PLT, INR, ALT, AST Albumin, creatinine, AFP, Fib-4 and IL28B genotypes.
